# Supplementary material
Source: PubMed Central journal article supplement (PMC124349)
Supplement: pnas_102609499_7.pdf [file pnas_102609499_7.pdf]

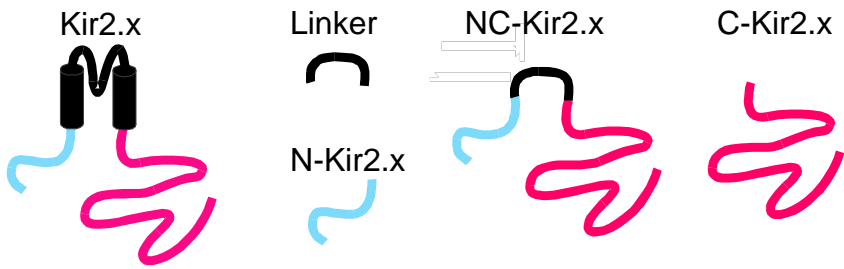

| Bait vector<br>pGBT-9 | Prey vector<br>pGAD424 | $\beta$ -Gal<br>activity |
|-----------------------|------------------------|--------------------------|
| NC-Kir2.1             | NC-Kir2.2              | +                        |
| NC-Kir2.1             | NC-Kir2.3              | +                        |
| NC-Kir2.3             | NC-Kir2.2              | ++                       |
| NC-Kir2.1             | NC-Kir2.1              | ++                       |
| NC-Kir2.3             | NC-Kir2.3              | ++                       |
| N-Kir2.1              | N-Kir2.2               | -                        |
| N-Kir2.1              | N-Kir2.3               | -                        |
| N-Kir2.2              | N-Kir2.3               | -                        |
| N-Kir2.1              | N-Kir2.1               | -                        |
| N-Kir2.2              | N-Kir2.2               | -                        |
| C-Kir2.1              | C-Kir2.2               | ++                       |
| C-Kir2.1              | C-Kir2.3               | +                        |
| C-Kir2.2              | C-Kir2.3               | +                        |
| C-Kir2.1              | C-Kir2.1               | +                        |
| C-Kir2.2              | C-Kir2.2               | +                        |
| C-Kir2.3              | C-Kir2.3               | +++                      |
| N-Kir2.1              | NC-Kir2.1              | +                        |
| N-Kir2.1              | NC-Kir2.2              | +                        |
| N-Kir2.1              | NC-Kir2.3              | +                        |
| N-Kir2.2              | NC-Kir2.2              | +                        |
| N-Kir2.2              | NC-Kir2.3              | +                        |
| NC-Kir2.3             | N-Kir2.3               | +                        |
| C-Kir2.1              | NC-Kir2.1              | +                        |
| C-Kir2.1              | NC-Kir2.2              | +                        |
| C-Kir2.1              | NC-Kir2.3              | +                        |
| C-Kir2.2              | NC-Kir2.2              | ++                       |
| C-Kir2.3              | NC-Kir2.3              | +++                      |
| N-Kir2.1              | PDZ                    | -                        |
| N-Kir2.2              | PDZ                    | -                        |
| C-Kir2.1              | PDZ                    | +++                      |
| C-Kir2.2              | PDZ                    | +++                      |
| C-Kir2.3              | PDZ                    | +++                      |

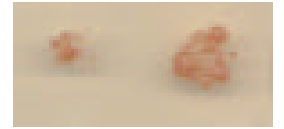

NC-Kir2.1/NC-Kir2.2

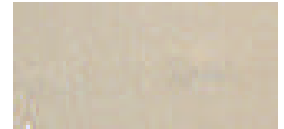

N-Kir2.1/N-Kir2.2

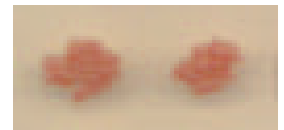

C-Kir2.1/C-Kir2.3

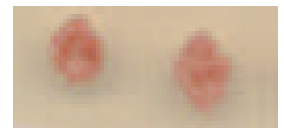

N-Kir2.1/NC-Kir2.2

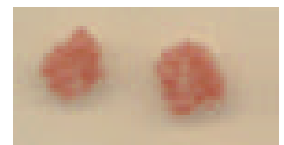

C-Kir2.1/NC-Kir2.2

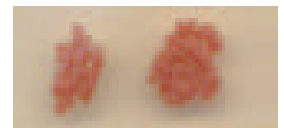

C-Kir2.2/PDZ
