# Supplementary material
Source: PubMed Central journal article supplement (PMC124349)

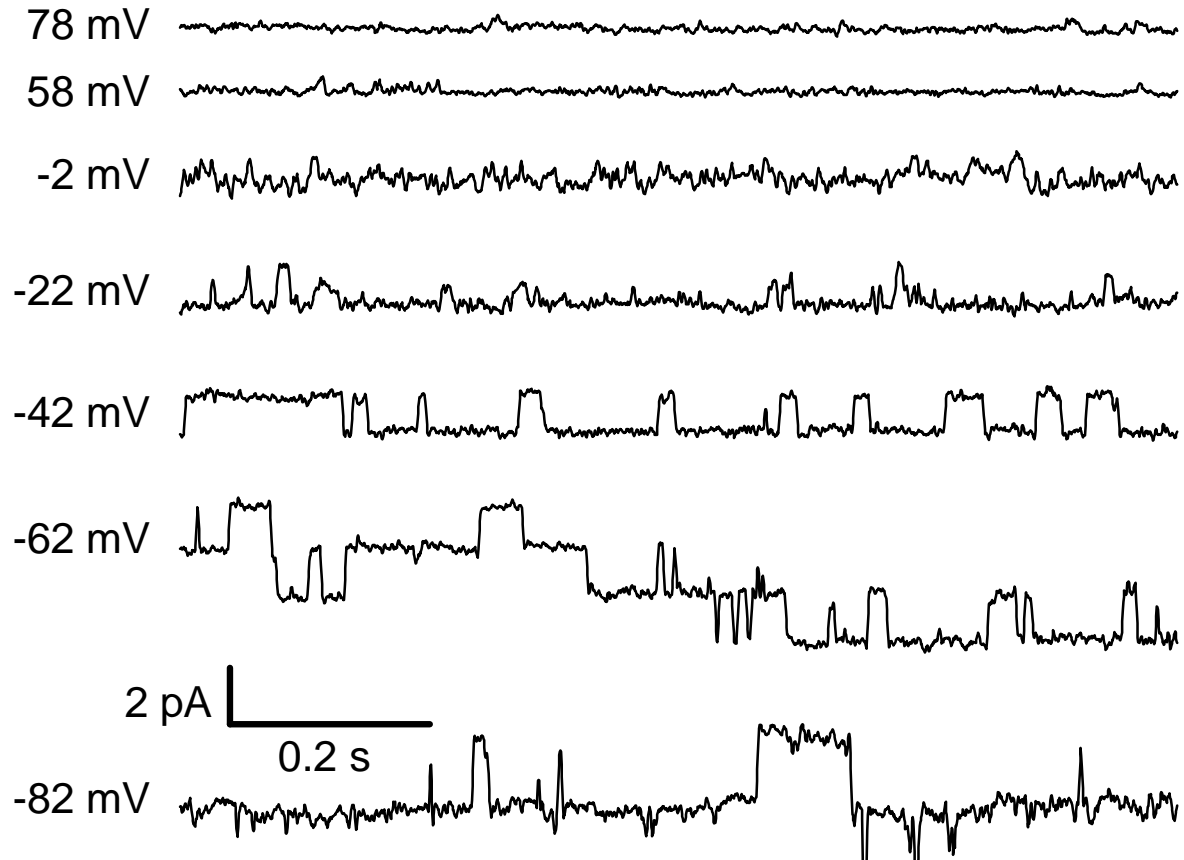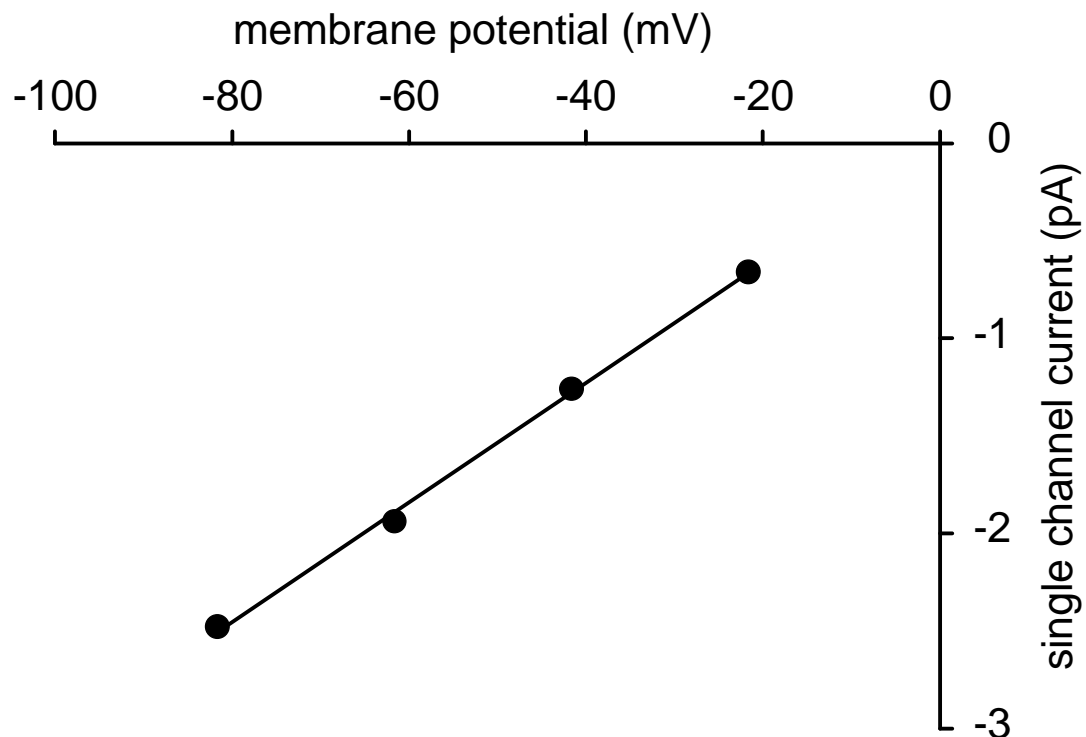

Supplement: pnas_102609499_5.pdf [file pnas_102609499_5.pdf]

Kir2.2-Kir2.1  
control

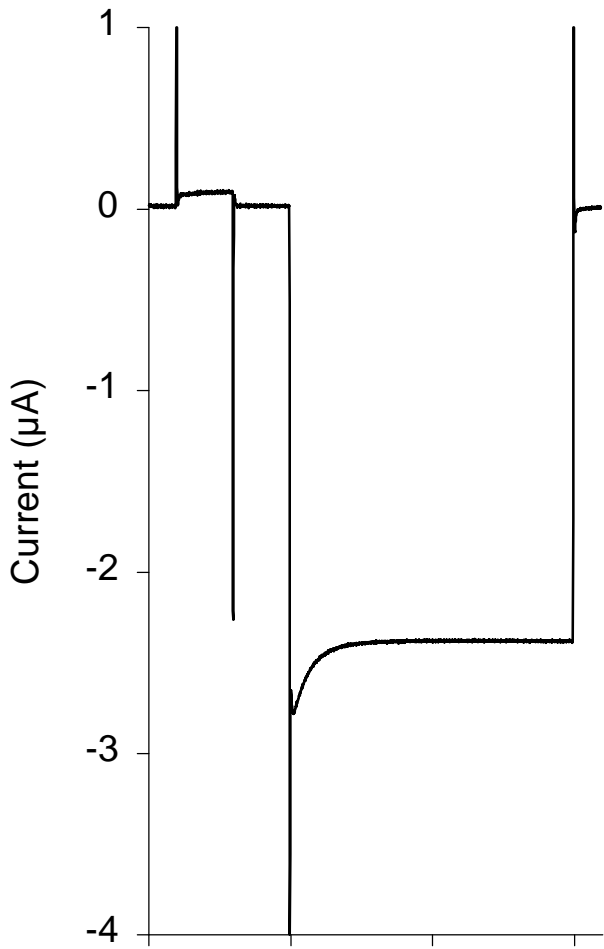

Kir2.2-Kir2.1  
+ Kir2.2-Kir2.1-AAA

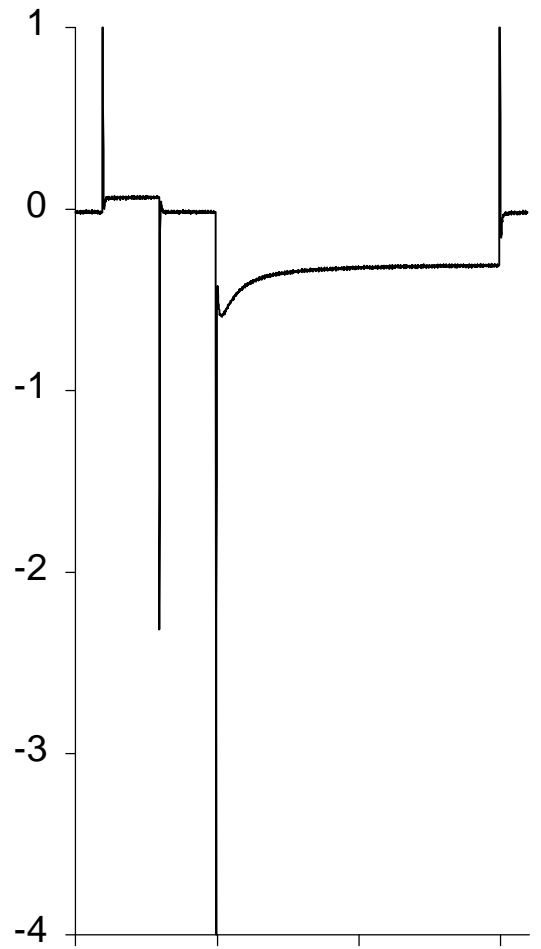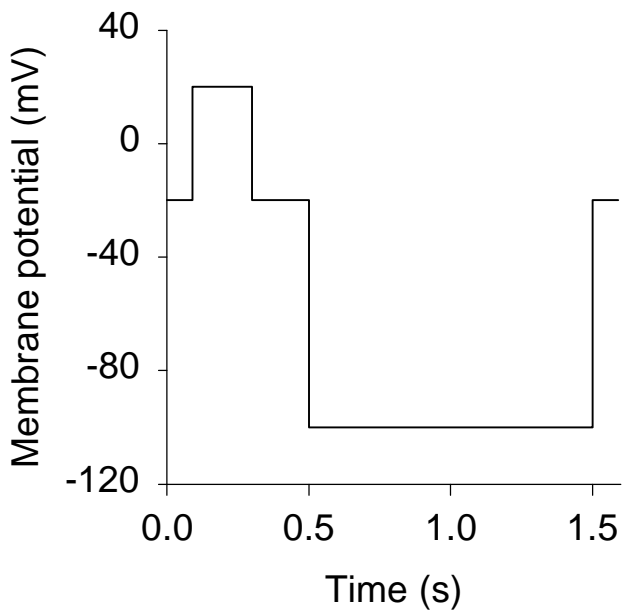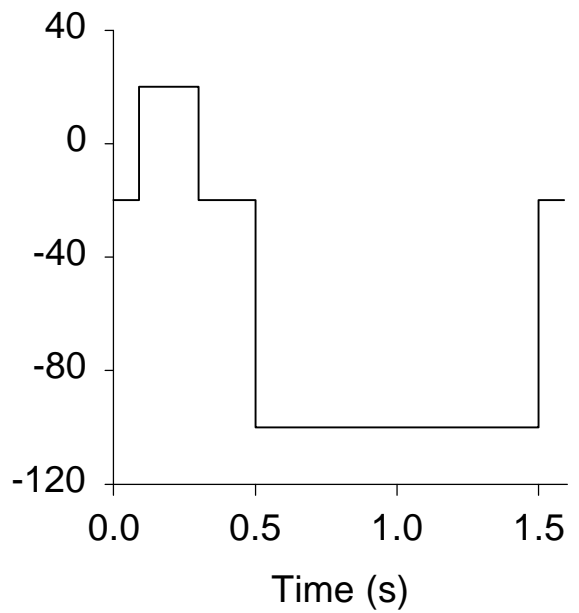

Supplement: pnas_102609499_6.pdf [file pnas_102609499_6.pdf]

hKir2.3  
control

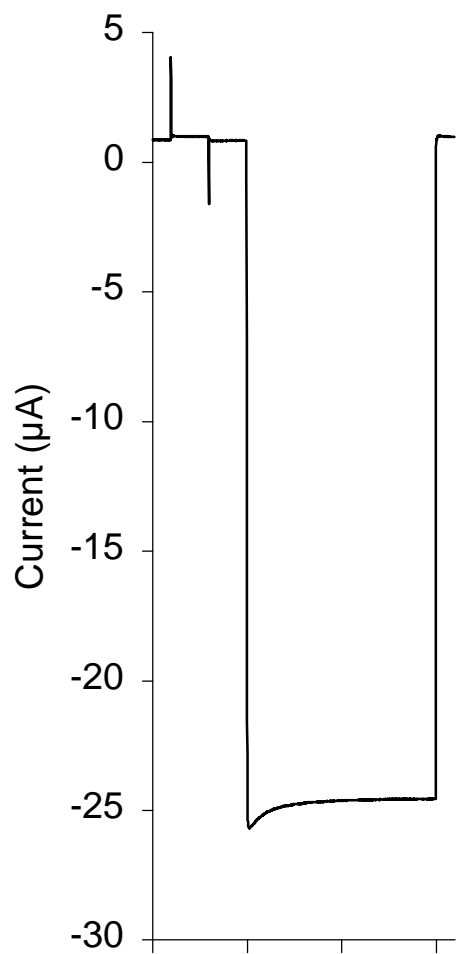

hKir2.3  
+ hKir2.1D71V

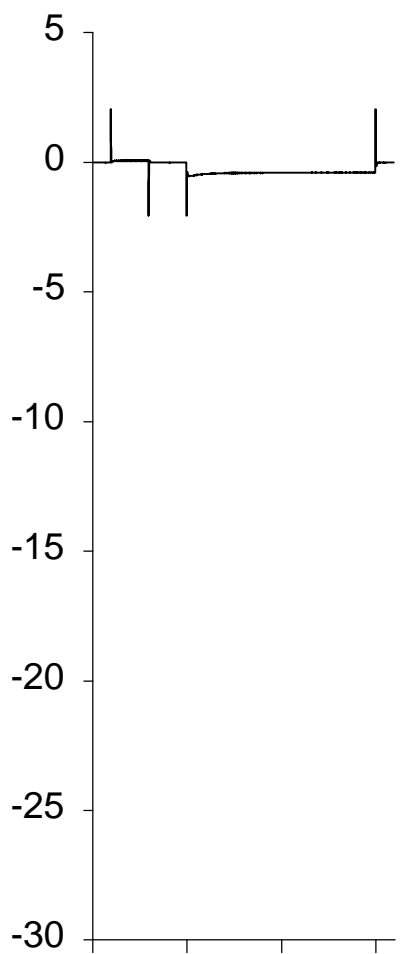

hKir2.3  
+ hKir2.1R218W

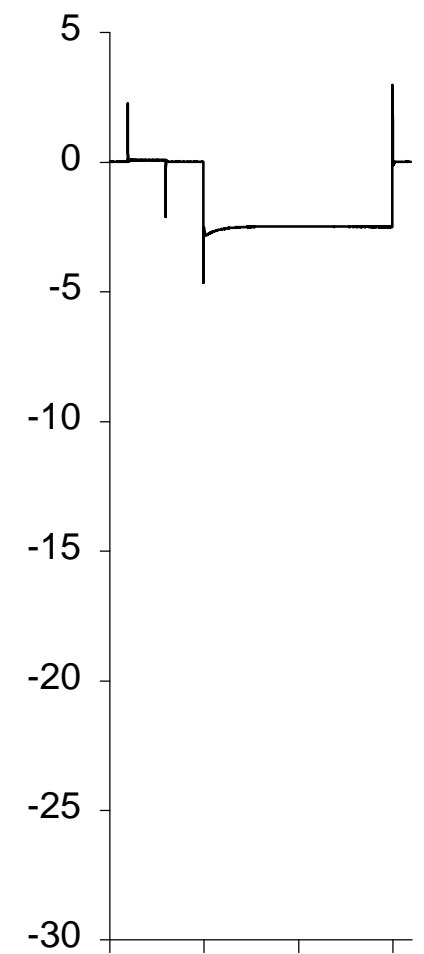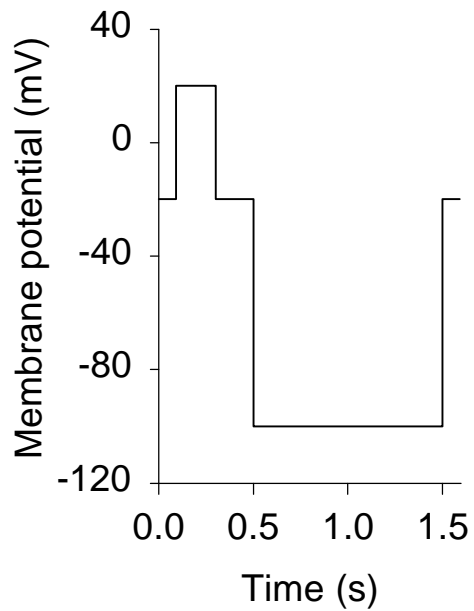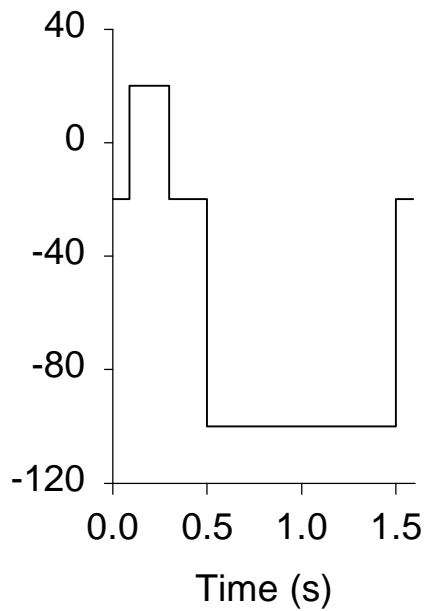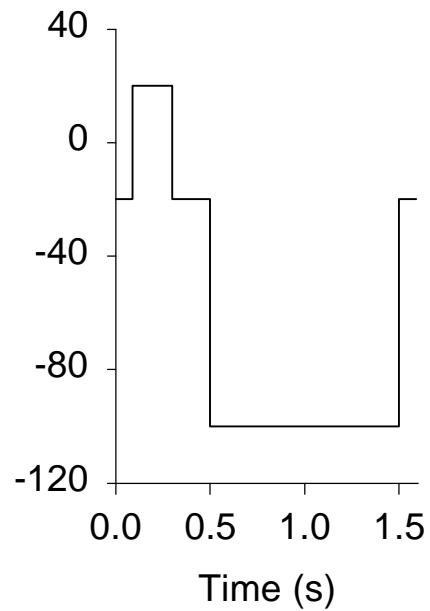

Supplement: pnas_102609499_8.pdf [file pnas_102609499_8.pdf]
